# Supplementary material for: Type II Collagen from Cartilage of Acipenser baerii Promotes Wound Healing in Human Dermal Fibroblasts and in Mouse Skin
Source: MDPI journal article supplement (doi:10.3390/md18100511), 2020-10-11
Supplement: s1 [file s1]

## Supplementary Materials

### **Type II Collagen from Cartilage of *Acipenser baerii* Promotes Wound Healing in Human Dermal Fibroblasts and in Mouse Skin**

**Ching-Shu Lai <sup>1</sup>, Chun-Wei Tu <sup>1</sup>, Hsing-Chun Kuo <sup>2</sup>, Pei-Pei Sun <sup>1</sup> and Mei-Ling Tsai <sup>1,\*</sup>**

<sup>1</sup> Department of Seafood Science, National Kaohsiung University of Science and Technology, Kaohsiung 811, Taiwan; chlai@nkust.edu.tw (C.-S.L.); 1061534108@nkust.edu.tw (C.-W.T.); ppsun@nkust.edu.tw (P.-P.S.)

<sup>2</sup> Department of Nursing, Division of Basic Medical Sciences, Chang Gung University of Science and Technology, Chiayi, 61363, Taiwan; guscsci@gmail.com

\* Correspondence: mltsai@nkust.edu.tw; Tel.: +886-7-361-7141 Ext 23623

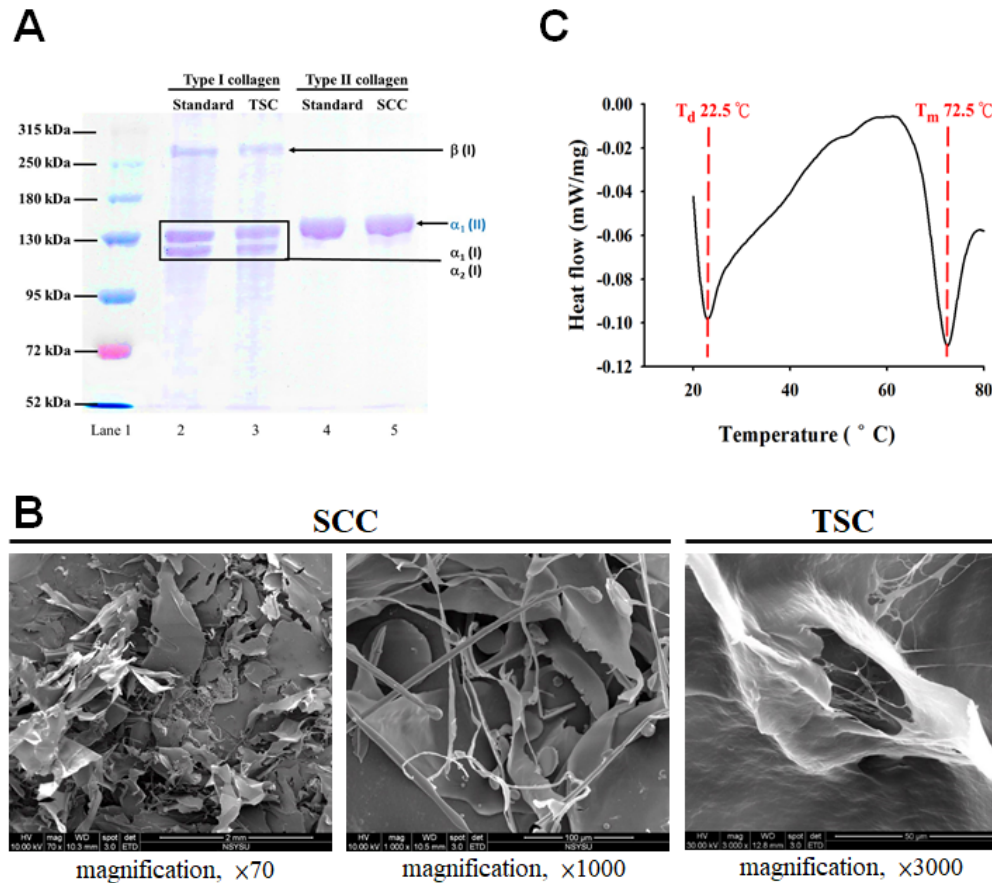

**Figure S1.** SDS-PAGE pattern and SEM images of collagen from the cartilage of *Acipenser baerii* (SCC). **(A)** Lane 1, molecular weight marker; lane 2, type I collagen standard from rat tail; lane 3, TSC; lane 4, type II collagen standard from chicken sternal cartilage and lane 5, SCC. **(B)** SEM images of lyophilized SCC and TSC. **(C)** DSC thermograms of SCC. X axis, temperature in °C; Y axis, heat flow.

**Table S1. Proximate compositions of cartilage from *Acipenser baerii***

| Composition                | Dry weight (%) |
|----------------------------|----------------|
| Crude protein <sup>a</sup> | 61.7 ± 0.66    |
| Crude fat                  | 6.39 ± 1.87    |
| Ash                        | 9.32 ± 1.21    |
| Carbohydrates              | 21.7 ± 1.04    |
| Total                      | 99.15          |

All values represent the mean of three replicates ± standard deviation.

<sup>a</sup>% protein = %total nitrogen × 5.95

<sup>b</sup>% Carbohydrate calculated by difference

**Table S2. Collagen yield of cartilage from *Acipenser baerii***

| Characteristics             |              |
|-----------------------------|--------------|
| Hydroxyproline (mg/g)       | 28.71 ± 0.48 |
| Collagen (%) <sup>a</sup>   | 28.77 ± 0.48 |
| Yield (%) <sup>b</sup>      | 20.11 ± 0.44 |
| Extraction (%) <sup>c</sup> | 69.92 ± 1.53 |

<sup>a</sup> The collagen content was obtained from hydroxyproline content with a factor of 10.02, which was calculated from the present result of amino acid profile (Table S3).

<sup>b</sup> Yield (%) = weight of lyophilized sample (g) / total solid weight of initial cartilage (g) × 100%

<sup>c</sup> Extraction (%) = yield /collagen × 100%

**Table S3. Amino acid profile of SCC and tilapia skin collagen (TSC)**

| Amino acid              | SCC     | TSC     |
|-------------------------|---------|---------|
| Gly                     | 345.30  | 351.84  |
| Pro                     | 113.63  | 121.33  |
| Hyp                     | 99.79   | 98.60   |
| Glu                     | 92.24   | 64.09   |
| Ala                     | 89.38   | 128.01  |
| Arg <sup>a</sup>        | 45.64   | 51.95   |
| Asp                     | 44.64   | 36.45   |
| Ser                     | 36.39   | 32.06   |
| Leu <sup>a</sup>        | 32.22   | 19.88   |
| Phe <sup>a</sup>        | 25.43   | 15.43   |
| Thr <sup>a</sup>        | 22.20   | 24.76   |
| Val <sup>a</sup>        | 16.40   | 15.31   |
| Lys <sup>a</sup>        | 13.54   | 22.78   |
| Ile <sup>a</sup>        | 11.69   | 7.33    |
| Met <sup>a</sup>        | 7.33    | 8.18    |
| Tyr                     | 3.18    | 0.91    |
| Cys                     | 1.00    | 1.08    |
| His <sup>a</sup>        | -       | -       |
| Total                   | 1000.00 | 1000.00 |
| Imino acid <sup>b</sup> | 213.42  | 219.93  |

<sup>a</sup> Essential amino acids

<sup>b</sup> Imino acids, include proline and hydroxyproline

**Table S4. List of primers used for qRT-PCR analysis**

| <b>Gene (human)</b>     | <b>Primer sequence</b>                                |
|-------------------------|-------------------------------------------------------|
| Snail                   | F-TCGGAAGCCTAACTACAGCGA<br>R-AGATGAGCATTGGCAGCGAG     |
| MMP1                    | F-AAAATTACACGCCAGATTTGCC<br>R-GGTGTGACATTACTCCAGAGTTG |
| N-cadherin              | F-TCAGGCGTCTGTAGAGGCTT<br>R-ATGCACATCCTTCGATAAGACTG   |
| Has2                    | F-CTCTTTTGGACTGTATGGTGCC<br>R-AGGGTAGGTTAGCCTTTTCACA  |
| Collagen I $\alpha$ 1   | F-GAGGGCCAAGACGAAGACATC<br>R-CAGATCACGTCATCGCACAAAC   |
| Collagen III $\alpha$ 1 | F-GGAGCTGGCTACTTCTCGC<br>R-GGGAACATCCTCCTTCAACAG      |
| Elastin                 | F-GCAGGAGTTAAGCCCAAGG<br>R-TGTAGGGCAGTCCATAGCCA       |
| GAPDH                   | F-TGTGGGCATCAATGGATTTGG<br>R-ACACCATGTATTCCGGGTCAAT   |
